# Supplementary material for: Value-Based Pricing and Budget Impact Analysis for Multi-Indication Drugs: A Case Study of Immunotherapies
Source: MDPI journal article supplement (doi:10.3390/ijerph19074105), 2022-03-30
Supplement: s1 [file s1]

**Supplementary Table S1.** The distributions and parameters of overall survival and progression-free survival curves obtained by survival analysis

| Indication                                                 | Treatment    | Overall survival |           |          | Progression-free Survival |           |         |
|------------------------------------------------------------|--------------|------------------|-----------|----------|---------------------------|-----------|---------|
|                                                            |              | Distribution     | Parameter |          | Distribution              | Parameter |         |
| Atezolizumab                                               |              |                  |           |          |                           |           |         |
| 2nd-line NSCLC<br>(reimbursed indication)                  | Intervention | Log-logistic     | Shape     | 1.3617   | Gen.gamma                 | Mu        | 0.9926  |
|                                                            |              |                  | Scale     | 13.1451  |                           | Sigma     | 1.1601  |
|                                                            | Comparator   | Log-logistic     | Shape     | 1.3617   | Log-normal                | Q         | -0.4318 |
|                                                            |              |                  | Scale     | 13.1451  |                           | Meanlog   | 1.2961  |
| 1st-line metastatic<br>NSCLC                               | Intervention | Gompertz         | Shape     | 0.02282  | Log-logistic              | Shape     | 1.6283  |
|                                                            |              |                  | Rate      | 0.028441 |                           | Scale     | 8.9497  |
|                                                            | Comparator   | Weibull          | Shape     | 1.2436   | Log-logistic              | Shape     | 1.6283  |
|                                                            |              |                  | Scale     | 20.8296  |                           | Scale     | 8.9497  |
| 1st-line locally<br>advanced or metastatic<br>TNBC         | Intervention | Log-logistic     | Shape     | 1.613    | Log-normal                | Meanlog   | 2.0136  |
|                                                            |              |                  | Scale     | 7.477    |                           | Sdlog     | 1.0541  |
|                                                            | Comparator   | Weibull          | Shape     | 1.092    | Log-normal                | Meanlog   | 2.0136  |
|                                                            |              |                  | Scale     | 7.8449   |                           | Sdlog     | 1.0541  |
| Nivolumab                                                  |              |                  |           |          |                           |           |         |
| 2nd-line NSCLC<br>(reimbursed indication)                  | Intervention | Log-normal       | Meanlog   | 2.3978   | Gen.gamma                 | Mu        | 0.9081  |
|                                                            |              |                  | Sdlog     | 1.3665   |                           | Sigma     | 1.2775  |
|                                                            | Comparator   | Log-logistic     | Shape     | 1.61     | Log-normal                | Q         | -0.7629 |
|                                                            |              |                  | Scale     | 8.1392   |                           | Meanlog   | 1.245   |
| 2nd-line advanced RCC                                      | Intervention | Log-normal       | Shape     | 1.61     | Gen.gamma                 | Sdlog     | 0.9107  |
|                                                            |              |                  | Scale     | 8.1392   |                           | Mu        | 1.1203  |
|                                                            | Comparator   | Log-normal       | Meanlog   | 3.3352   | Gen.gamma                 | Sigma     | 0.7785  |
|                                                            |              |                  | Sdlog     | 1.2084   |                           | Q         | -1.5512 |
| 2nd-line recurrent or<br>metastatic HNSCC                  | Intervention | Log-normal       | Meanlog   | 3.3352   | Gen.gamma                 | Mu        | 1.3078  |
|                                                            |              |                  | Sdlog     | 1.2084   |                           | Sigma     | 0.7913  |
|                                                            | Comparator   | Log-logistic     | Shape     | 2.0056   | Log-logistic              | Q         | -0.9403 |
|                                                            |              |                  | Sdlog     | 1.3701   |                           | Shape     | 2.022   |
| Pembrolizumab                                              | Intervention | Log-normal       | Shape     | 2.0056   | Log-logistic              | Scale     | 2.465   |
|                                                            |              |                  | Sdlog     | 1.3701   |                           | Shape     | 2.269   |
|                                                            | Comparator   | Log-logistic     | Shape     | 1.804    | Log-logistic              | Scale     | 2.269   |
|                                                            |              |                  | Scale     | 5.104    |                           | Scale     | 2.488   |
| 2nd-line NSCLC<br>(reimbursed indication)                  | Intervention | Log-normal       | Meanlog   | 2.8782   | Gen.gamma                 | Mu        | 1.0281  |
|                                                            |              |                  | Sdlog     | 1.5718   |                           | Sigma     | 1.262   |
|                                                            | Comparator   | Log-normal       | Shape     | 2.8782   | Log-normal                | Q         | -1.508  |
|                                                            |              |                  | Sdlog     | 1.5718   |                           | Meanlog   | 1.3965  |
| 1st-line treatment of<br>metastatic non-<br>squamous NSCLC | Intervention | Exponential      | Shape     | 2.8782   | Log-logistic              | Sdlog     | 1.0339  |
|                                                            |              |                  | Rate      | 0.03135  |                           | Shape     | 1.4816  |
|                                                            | Comparator   | Log-normal       | Meanlog   | 2.5031   | Log-logistic              | Scale     | 9.2301  |
|                                                            |              |                  | Sdlog     | 1.2887   |                           | Shape     | 1.4816  |
|                                                            |              |                  |           |          |                           |           |         |
|                                                            |              |                  |           |          |                           |           |         |
|                                                            |              |                  |           |          |                           |           |         |
|                                                            |              |                  |           |          |                           |           |         |
|                                                            |              |                  |           |          |                           |           |         |
|                                                            |              |                  |           |          |                           |           |         |
|                                                            |              |                  |           |          |                           |           |         |
|                                                            |              |                  |           |          |                           |           |         |
|                                                            |              |                  |           |          |                           |           |         |
|                                                            |              |                  |           |          |                           |           |         |
|                                                            |              |                  |           |          |                           |           |         |
|                                                            |              |                  |           |          |                           |           |         |
|                                                            |              |                  |           |          |                           |           |         |
|                                                            |              |                  |           |          |                           |           |         |
|                                                            |              |                  |           |          |                           |           |         |
|                                                            |              |                  |           |          |                           |           |         |
|                                                            |              |                  |           |          |                           |           |         |
|                                                            |              |                  |           |          |                           |           |         |
|                                                            |              |                  |           |          |                           |           |         |
|                                                            |              |                  |           |          |                           |           |         |
|                                                            |              |                  |           |          |                           |           |         |
|                                                            |              |                  |           |          |                           |           |         |
|                                                            |              |                  |           |          |                           |           |         |
|                                                            |              |                  |           |          |                           |           |         |
|                                                            |              |                  |           |          |                           |           |         |
|                                                            |              |                  |           |          |                           |           |         |
|                                                            |              |                  |           |          |                           |           |         |
|                                                            |              |                  |           |          |                           |           |         |
|                                                            |              |                  |           |          |                           |           |         |
|                                                            |              |                  |           |          |                           |           |         |
|                                                            |              |                  |           |          |                           |           |         |
|                                                            |              |                  |           |          |                           |           |         |
|                                                            |              |                  |           |          |                           |           |         |
|                                                            |              |                  |           |          |                           |           |         |
|                                                            |              |                  |           |          |                           |           |         |
|                                                            |              |                  |           |          |                           |           |         |
|                                                            |              |                  |           |          |                           |           |         |
|                                                            |              |                  |           |          |                           |           |         |
|                                                            |              |                  |           |          |                           |           |         |
|                                                            |              |                  |           |          |                           |           |         |
|                                                            |              |                  |           |          |                           |           |         |
|                                                            |              |                  |           |          |                           |           |         |
|                                                            |              |                  |           |          |                           |           |         |
|                                                            |              |                  |           |          |                           |           |         |
|                                                            |              |                  |           |          |                           |           |         |
|                                                            |              |                  |           |          |                           |           |         |
|                                                            |              |                  |           |          |                           |           |         |
|                                                            |              |                  |           |          |                           |           |         |
|                                                            |              |                  |           |          |                           |           |         |
|                                                            |              |                  |           |          |                           |           |         |
|                                                            |              |                  |           |          |                           |           |         |
|                                                            |              |                  |           |          |                           |           |         |
|                                                            |              |                  |           |          |                           |           |         |
|                                                            |              |                  |           |          |                           |           |         |
|                                                            |              |                  |           |          |                           |           |         |
|                                                            |              |                  |           |          |                           |           |         |
|                                                            |              |                  |           |          |                           |           |         |
|                                                            |              |                  |           |          |                           |           |         |
|                                                            |              |                  |           |          |                           |           |         |
|                                                            |              |                  |           |          |                           |           |         |
|                                                            |              |                  |           |          |                           |           |         |
|                                                            |              |                  |           |          |                           |           |         |
|                                                            |              |                  |           |          |                           |           |         |
|                                                            |              |                  |           |          |                           |           |         |
|                                                            |              |                  |           |          |                           |           |         |
|                                                            |              |                  |           |          |                           |           |         |
|                                                            |              |                  |           |          |                           |           |         |
|                                                            |              |                  |           |          |                           |           |         |
|                                                            |              |                  |           |          |                           |           |         |
|                                                            |              |                  |           |          |                           |           |         |
|                                                            |              |                  |           |          |                           |           |         |
|                                                            |              |                  |           |          |                           |           |         |
|                                                            |              |                  |           |          |                           |           |         |
|                                                            |              |                  |           |          |                           |           |         |
|                                                            |              |                  |           |          |                           |           |         |
|                                                            |              |                  |           |          |                           |           |         |
|                                                            |              |                  |           |          |                           |           |         |
|                                                            |              |                  |           |          |                           |           |         |
|                                                            |              |                  |           |          |                           |           |         |
|                                                            |              |                  |           |          |                           |           |         |
|                                                            |              |                  |           |          |                           |           |         |
|                                                            |              |                  |           |          |                           |           |         |
|                                                            |              |                  |           |          |                           |           |         |
|                                                            |              |                  |           |          |                           |           |         |
|                                                            |              |                  |           |          |                           |           |         |
|                                                            |              |                  |           |          |                           |           |         |
|                                                            |              |                  |           |          |                           |           |         |
|                                                            |              |                  |           |          |                           |           |         |
|                                                            |              |                  |           |          |                           |           |         |
|                                                            |              |                  |           |          |                           |           |         |
|                                                            |              |                  |           |          |                           |           |         |
|                                                            |              |                  |           |          |                           |           |         |
|                                                            |              |                  |           |          |                           |           |         |
|                                                            |              |                  |           |          |                           |           |         |
|                                                            |              |                  |           |          |                           |           |         |
|                                                            |              |                  |           |          |                           |           |         |
|                                                            |              |                  |           |          |                           |           |         |
|                                                            |              |                  |           |          |                           |           |         |
|                                                            |              |                  |           |          |                           |           |         |
|                                                            |              |                  |           |          |                           |           |         |
|                                                            |              |                  |           |          |                           |           |         |
|                                                            |              |                  |           |          |                           |           |         |
|                                                            |              |                  |           |          |                           |           |         |
|                                                            |              |                  |           |          |                           |           |         |
|                                                            |              |                  |           |          |                           |           |         |
|                                                            |              |                  |           |          |                           |           |         |
|                                                            |              |                  |           |          |                           |           |         |
|                                                            |              |                  |           |          |                           |           |         |
|                                                            |              |                  |           |          |                           |           |         |
|                                                            |              |                  |           |          |                           |           |         |
|                                                            |              |                  |           |          |                           |           |         |
|                                                            |              |                  |           |          |                           |           |         |
|                                                            |              |                  |           |          |                           |           |         |
|                                                            |              |                  |           |          |                           |           |         |
|                                                            |              |                  |           |          |                           |           |         |
|                                                            |              |                  |           |          |                           |           |         |
|                                                            |              |                  |           |          |                           |           |         |
|                                                            |              |                  |           |          |                           |           |         |
|                                                            |              |                  |           |          |                           |           |         |
|                                                            |              |                  |           |          |                           |           |         |
|                                                            |              |                  |           |          |                           |           |         |
|                                                            |              |                  |           |          |                           |           |         |
|                                                            |              |                  |           |          |                           |           |         |
|                                                            |              |                  |           |          |                           |           |         |
|                                                            |              |                  |           |          |                           |           |         |
|                                                            |              |                  |           |          |                           |           |         |
|                                                            |              |                  |           |          |                           |           |         |
|                                                            |              |                  |           |          |                           |           |         |
|                                                            |              |                  |           |          |                           |           |         |
|                                                            |              |                  |           |          |                           |           |         |
|                                                            |              |                  |           |          |                           |           |         |
|                                                            |              |                  |           |          |                           |           |         |
|                                                            |              |                  |           |          |                           |           |         |
|                                                            |              |                  |           |          |                           |           |         |
|                                                            |              |                  |           |          |                           |           |         |
|                                                            |              |                  |           |          |                           |           |         |
|                                                            |              |                  |           |          |                           |           |         |
|                                                            |              |                  |           |          |                           |           |         |
|                                                            |              |                  |           |          |                           |           |         |
|                                                            |              |                  |           |          |                           |           |         |
|                                                            |              |                  |           |          |                           |           |         |
|                                                            |              |                  |           |          |                           |           |         |
|                                                            |              |                  |           |          |                           |           |         |
|                                                            |              |                  |           |          |                           |           |         |
|                                                            |              |                  |           |          |                           |           |         |
|                                                            |              |                  |           |          |                           |           |         |
|                                                            |              |                  |           |          |                           |           |         |
|                                                            |              |                  |           |          |                           |           |         |
|                                                            |              |                  |           |          |                           |           |         |
|                                                            |              |                  |           |          |                           |           |         |
|                                                            |              |                  |           |          |                           |           |         |
|                                                            |              |                  |           |          |                           |           |         |
|                                                            |              |                  |           |          |                           |           |         |
|                                                            |              |                  |           |          |                           |           |         |
|                                                            |              |                  |           |          |                           |           |         |
|                                                            |              |                  |           |          |                           |           |         |
|                                                            |              |                  |           |          |                           |           |         |
|                                                            |              |                  |           |          |                           |           |         |
|                                                            |              |                  |           |          |                           |           |         |
|                                                            |              |                  |           |          |                           |           |         |
|                                                            |              |                  |           |          |                           |           |         |
|                                                            |              |                  |           |          |                           |           |         |
|                                                            |              |                  |           |          |                           |           |         |
|                                                            |              |                  |           |          |                           |           |         |
|                                                            |              |                  |           |          |                           |           |         |
|                                                            |              |                  |           |          |                           |           |         |
|                                                            |              |                  |           |          |                           |           |         |
|                                                            |              |                  |           |          |                           |           |         |
|                                                            |              |                  |           |          |                           |           |         |
|                                                            |              |                  |           |          |                           |           |         |
|                                                            |              |                  |           |          |                           |           |         |
|                                                            |              |                  |           |          |                           |           |         |
|                                                            |              |                  |           |          |                           |           |         |
|                                                            |              |                  |           |          |                           |           |         |
|                                                            |              |                  |           |          |                           |           |         |
|                                                            |              |                  |           |          |                           |           |         |
|                                                            |              |                  |           |          |                           |           |         |
|                                                            |              |                  |           |          |                           |           |         |
|                                                            |              |                  |           |          |                           |           |         |
|                                                            |              |                  |           |          |                           |           |         |
|                                                            |              |                  |           |          |                           |           |         |
|                                                            |              |                  |           |          |                           |           |         |
|                                                            |              |                  |           |          |                           |           |         |
|                                                            |              |                  |           |          |                           |           |         |
|                                                            |              |                  |           |          |                           |           |         |
|                                                            |              |                  |           |          |                           |           |         |
|                                                            |              |                  |           |          |                           |           |         |
|                                                            |              |                  |           |          |                           |           |         |
|                                                            |              |                  |           |          |                           |           |         |
|                                                            |              |                  |           |          |                           |           |         |
|                                                            |              |                  |           |          |                           |           |         |
|                                                            |              |                  |           |          |                           |           |         |
|                                                            |              |                  |           |          |                           |           |         |
|                                                            |              |                  |           |          |                           |           |         |
|                                                            |              |                  |           |          |                           |           |         |
|                                                            |              |                  |           |          |                           |           |         |
|                                                            |              |                  |           |          |                           |           |         |
|                                                            |              |                  |           |          |                           |           |         |
|                                                            |              |                  |           |          |                           |           |         |
|                                                            |              |                  |           |          |                           |           |         |
|                                                            |              |                  |           |          |                           |           |         |
|                                                            |              |                  |           |          |                           |           |         |
|                                                            |              |                  |           |          |                           |           |         |
|                                                            |              |                  |           |          |                           |           |         |
|                                                            |              |                  |           |          |                           |           |         |
|                                                            |              |                  |           |          |                           |           |         |
|                                                            |              |                  |           |          |                           |           |         |
|                                                            |              |                  |           |          |                           |           |         |
|                                                            |              |                  |           |          |                           |           |         |
|                                                            |              |                  |           |          |                           |           |         |
|                                                            |              |                  |           |          |                           |           |         |
|                                                            |              |                  |           |          |                           |           |         |
|                                                            |              |                  |           |          |                           |           |         |
|                                                            |              |                  |           |          |                           |           |         |
|                                                            |              |                  |           |          |                           |           |         |
|                                                            |              |                  |           |          |                           |           |         |
|                                                            |              |                  |           |          |                           |           |         |
|                                                            |              |                  |           |          |                           |           |         |
|                                                            |              |                  |           |          |                           |           |         |
|                                                            |              |                  |           |          |                           |           |         |
|                                                            |              |                  |           |          |                           |           |         |
|                                                            |              |                  |           |          |                           |           |         |
|                                                            |              |                  |           |          |                           |           |         |
|                                                            |              |                  |           |          |                           |           |         |
|                                                            |              |                  |           |          |                           |           |         |
|                                                            |              |                  |           |          |                           |           |         |
|                                                            |              |                  |           |          |                           |           |         |
|                                                            |              |                  |           |          |                           |           |         |
|                                                            |              |                  |           |          |                           |           |         |
|                                                            |              |                  |           |          |                           |           |         |
|                                                            |              |                  |           |          |                           |           |         |
|                                                            |              |                  |           |          |                           |           |         |
|                                                            |              |                  |           |          |                           |           |         |
|                                                            |              |                  |           |          |                           |           |         |
|                                                            |              |                  |           |          |                           |           |         |
|                                                            |              |                  |           |          |                           |           |         |
|                                                            |              |                  |           |          |                           |           |         |
|                                                            |              |                  |           |          |                           |           |         |
|                                                            |              |                  |           |          |                           |           |         |
|                                                            |              |                  |           |          |                           |           |         |
|                                                            |              |                  |           |          |                           |           |         |
|                                                            |              |                  |           |          |                           |           |         |
|                                                            |              |                  |           |          |                           |           |         |
|                                                            |              |                  |           |          |                           |           |         |

|                                                                                         |              |              |         |          |              |         |         |
|-----------------------------------------------------------------------------------------|--------------|--------------|---------|----------|--------------|---------|---------|
| 1st-line treatment of metastatic squamous NSCLC                                         | Intervention | Weibull      | Shape   | 1.1752   | Log-logistic | Shape   | 1.4915  |
|                                                                                         |              |              | Scale   | 24.2974  |              | Scale   | 8.3228  |
|                                                                                         | Comparator   | Weibull      | Shape   | 1.1752   | Log-logistic | Shape   | 1.4915  |
|                                                                                         |              |              | Scale   | 24.2974  |              | Scale   | 8.3228  |
| 1st-line metastatic NSCLC (≥50% TPS)                                                    | Intervention | Gompertz     | Shape   | -0.03856 | Gompertz     | Shape   | -0.1052 |
|                                                                                         |              |              | Rate    | 0.03986  |              | Rate    | 0.1124  |
|                                                                                         | Comparator   | Gompertz     | Shape   | -0.03856 | Log-normal   | Meanlog | 1.5225  |
|                                                                                         |              |              | Rate    | 0.03986  |              | Sdlog   | 0.9494  |
| 1st-line treatment of metastatic or unresectable recurrent HNSCC as monotherapy         | Intervention | Log-normal   | Meanlog | 2.5166   | Gen.gamma    | Mu      | 0.9879  |
|                                                                                         |              |              | Sdlog   | 1.3798   |              | Sigma   | 1.1172  |
|                                                                                         | Comparator   | Weibull      | Shape   | 1.2255   | Log-logistic | Q       | -0.6969 |
|                                                                                         |              |              | Scale   | 15.2282  |              | Shape   | 1.956   |
| 1st-line treatment of metastatic or unresectable recurrent HNSCC as combination therapy | Intervention | Exponential  | Rate    | 0.0507   | Log-logistic | Scale   | 4.9135  |
|                                                                                         |              |              | Rate    | 0.0507   |              | Shape   | 1.5703  |
|                                                                                         | Comparator   | Weibull      | Shape   | 1.2512   | Log-logistic | Shape   | 2.002   |
|                                                                                         |              |              | Scale   | 15.1327  |              | Scale   | 4.906   |
| 2nd-line recurrent or metastatic HNSCC (≥ 50% TPS)                                      | Intervention | Exponential  | Rate    | 0.05777  | Log-logistic | Shape   | 1.369   |
|                                                                                         |              |              | Rate    | 0.05777  |              | Scale   | 4.015   |
|                                                                                         | Comparator   | Exponential  | Rate    | 0.05777  | Log-logistic | Shape   | 2.139   |
|                                                                                         |              |              | Rate    | 0.05777  |              | Scale   | 2.351   |
| 1st-line treatment of advanced renal cell carcinoma                                     | Intervention | Log-logistic | Shape   | 1.382    | Log-normal   | Meanlog | 2.7714  |
|                                                                                         |              |              | Scale   | 50.964   |              | Sdlog   | 1.2993  |
|                                                                                         | Comparator   | Log-normal   | Meanlog | 3.7437   | Log-normal   | Meanlog | 2.7714  |
|                                                                                         |              |              | Sdlog   | 1.5704   |              | Sdlog   | 1.2993  |

Abbreviations: NSCLC, non-small cell lung-cancer; TNBC, triple-negative breast cancer; RCC, renal cell carcinoma; HNSCC, head and neck squamous cell carcinoma; TPS, tumor proportion score

**Supplementary Table S2.** Key input data for the cost-effectiveness model

| Indication                                   | Health states | Cost, \$US                               |              |            | Utility      |            |
|----------------------------------------------|---------------|------------------------------------------|--------------|------------|--------------|------------|
|                                              |               | Category                                 | Intervention | Comparator | Intervention | Comparator |
| Atezolizumab                                 |               |                                          |              |            |              |            |
| 2nd-line NSCLC<br>(reimbursed indication)    | PF            | Treatment cost                           | 2,970        | 820        | 0.74         | 0.74       |
|                                              |               | Dispensing cost                          | 35           | 35         |              |            |
|                                              |               | Monitoring and outpatient visit cost     | 233          | 233        |              |            |
|                                              |               | Adverse event cost                       | 23           | 441        |              |            |
|                                              | PD            | Subsequent treatment and monitoring cost | 1,232        | 2,037      | 0.59         | 0.59       |
|                                              | Death         | End-of-life cost                         | 2,894        | 2,894      | -            | -          |
| 1st-line metastatic NSCLC                    | PF            | Treatment cost (1~6 cycle)               | 7,279        | 4,310      | 0.71         | 0.71       |
|                                              |               | Treatment cost (after 7 cycle)           | 6,588        | 3,619      |              |            |
|                                              |               | Dispensing cost (1~6 cycle)              | 57           | 57         |              |            |
|                                              |               | Dispensing cost (after 7 cycle)          | 55           | 55         |              |            |
|                                              |               | Monitoring and outpatient visit cost     | 239          | 239        |              |            |
|                                              |               | Adverse event cost                       | 717          | 534        |              |            |
|                                              | PD            | Subsequent treatment and monitoring cost | 959          | 2,192      | 0.67         | 0.67       |
|                                              | Death         | End-of-life cost                         | 2,847        | 2,847      | -            | -          |
| 1st-line locally advanced or metastatic TNBC | PF            | Treatment cost                           | 4,658        | 1,540      | 0.715        | 0.715      |
|                                              |               | Dispensing cost                          | 83           | 55         |              |            |
|                                              |               | Monitoring and outpatient visit cost     | 418          | 557        |              |            |
|                                              |               | Adverse event cost                       | 175          | 150        |              |            |
|                                              | PD            | Subsequent treatment and monitoring cost | 1,453        | 1,783      | 0.443        | 0.443      |
|                                              | Death         | End-of-life cost                         | 2,907        | 2,907      | -            | -          |
| Nivolumab                                    |               |                                          |              |            |              |            |
| 2nd-line NSCLC<br>(reimbursed indication)    | PF            | Treatment cost                           | 4,845        | 933        | 0.74         | 0.74       |
|                                              |               | Dispensing cost                          | 50           | 34         |              |            |
|                                              |               | Monitoring and outpatient visit cost     | 266          | 214        |              |            |
|                                              |               | Adverse event cost                       | 125          | 843        |              |            |
|                                              | PD            | Subsequent treatment and monitoring cost | 1,129        | 1,548      | 0.59         | 0.59       |
|                                              | Death         | End-of-life cost                         | 2,978        | 2,978      | -            | -          |
| 2nd-line advanced RCC                        | PF            | Treatment cost                           | 4,819        | 1,325      | 0.895        | 0.895      |
|                                              |               | Dispensing cost                          | 83           | 8          |              |            |
|                                              |               | Monitoring and outpatient visit cost     | 311          | 260        |              |            |

|                                                     |                      |                                          |        |       |       |       |
|-----------------------------------------------------|----------------------|------------------------------------------|--------|-------|-------|-------|
|                                                     |                      | Adverse event cost                       | 9      | 45    |       |       |
|                                                     | PD                   | Subsequent treatment and monitoring cost | 2,293  | 3,340 | 0.817 | 0.817 |
|                                                     | Death                | End-of-life cost                         | 2,,941 | 2,941 | -     | -     |
| 2nd-line recurrent or metastatic HNSCC              |                      | Treatment cost                           | 4,819  | 3,707 |       |       |
|                                                     |                      | Dispensing cost                          | 83     | 57    |       |       |
|                                                     | PF                   | Monitoring and outpatient visit cost     | 185    | 189   | 0.805 | 0.77  |
|                                                     |                      | Adverse event cost                       | 6      | 27    |       |       |
|                                                     | PD                   | Subsequent treatment and monitoring cost | 911    | 905   | 0.746 | 0.676 |
|                                                     | Death                | End-of-life cost                         | 2,506  | 2,506 | -     | -     |
|                                                     | <b>Pembrolizumab</b> |                                          |        |       |       |       |
| 2nd-line NSCLC (reimbursed indication)              |                      | Treatment cost                           | 7,364  | 933   |       |       |
|                                                     |                      | Dispensing cost                          | 34     | 34    |       |       |
|                                                     | PF                   | Monitoring and outpatient visit cost     | 214    | 214   | 0.74  | 0.74  |
|                                                     |                      | Adverse event cost                       | 0      | 157   |       |       |
|                                                     | PD                   | Subsequent treatment and monitoring cost | 686    | 1,279 | 0.59  | 0.59  |
|                                                     | Death                | End-of-life cost                         | 2,978  | 2,978 | -     | -     |
|                                                     |                      | Treatment cost                           | 8,278  | 953   |       |       |
| 1st-line treatment of metastatic non-squamous NSCLC |                      | Dispensing cost                          | 57     | 57    |       |       |
|                                                     | PF                   | Monitoring and outpatient visit cost     | 239    | 239   | 0.74  | 0.74  |
|                                                     |                      | Adverse event cost                       | 552    | 455   |       |       |
|                                                     | PD                   | Subsequent treatment and monitoring cost | 939    | 2,766 | 0.67  | 0.67  |
|                                                     | Death                | End-of-life cost                         | 2,847  | 2,847 | -     | -     |
|                                                     |                      | Treatment cost                           | 8,016  | 691   |       |       |
|                                                     |                      | Dispensing cost                          | 57     | 57    |       |       |
| 1st-line treatment of metastatic squamous NSCLC     | PF                   | Monitoring and outpatient visit cost     | 239    | 239   | 0.74  | 0.74  |
|                                                     |                      | Adverse event cost                       | 531    | 571   |       |       |
|                                                     | PD                   | Subsequent treatment and monitoring cost | 618    | 948   | 0.67  | 0.67  |
|                                                     | Death                | End-of-life cost                         | 2,847  | 2,847 | -     | -     |
|                                                     |                      | Treatment cost                           | 7,325  | 871   |       |       |
|                                                     |                      | Dispensing cost                          | 57     | 57    |       |       |
|                                                     | PF                   | Monitoring and outpatient visit cost     | 239    | 239   | 0.778 | 0.778 |
| 1st-line metastatic NSCLC (≥50% TPS)                |                      | Adverse event cost                       | 7      | 423   |       |       |
|                                                     | PD                   | Subsequent treatment and monitoring cost | 231    | 353   | 0.641 | 0.641 |
|                                                     | Death                | End-of-life cost                         | 2,847  | 2,847 | -     | -     |
|                                                     |                      | Treatment cost                           | 7,325  | 3,723 | 0.805 | 0.77  |
| 1st-line treatment of                               | PF                   | Treatment cost                           | 7,325  | 3,723 | 0.805 | 0.77  |

|                                                                                         |             |                                          |       |       |       |       |
|-----------------------------------------------------------------------------------------|-------------|------------------------------------------|-------|-------|-------|-------|
| metastatic or unresectable recurrent HNSCC as monotherapy                               | (1~6 cycle) |                                          |       |       |       |       |
|                                                                                         |             | Treatment cost                           | 7,325 | 3,661 |       |       |
|                                                                                         |             | (after 7 cycle)                          |       |       |       |       |
|                                                                                         |             | Dispensing cost                          | 55    | 55    |       |       |
|                                                                                         |             | Monitoring and outpatient visit cost     | 188   | 188   |       |       |
|                                                                                         |             | Adverse event cost                       | 242   | 931   |       |       |
|                                                                                         | PD          | Subsequent treatment and monitoring cost | 1,481 | 1,778 | 0.746 | 0.676 |
|                                                                                         | Death       | End-of-life cost                         | 2,506 | 2,506 | -     | -     |
| 1st-line treatment of metastatic or unresectable recurrent HNSCC as combination therapy | PF          | Treatment cost                           | 7,440 | 3,723 |       |       |
|                                                                                         |             | (1~6 cycle)                              |       |       |       |       |
|                                                                                         |             | Treatment cost                           | 7,325 | 3,661 |       |       |
|                                                                                         |             | (after 7 cycle)                          |       |       |       |       |
|                                                                                         |             | Dispensing cost                          | 55    | 57    | 0.805 | 0.77  |
|                                                                                         |             | Monitoring and outpatient visit cost     | 188   | 188   |       |       |
|                                                                                         |             | Adverse event cost                       | 1,074 | 981   |       |       |
|                                                                                         | PD          | Subsequent treatment and monitoring cost | 1,234 | 1,779 | 0.746 | 0.676 |
|                                                                                         | Death       | End-of-life cost                         | 2,506 | 2,506 | -     | -     |
| 2nd-line recurrent or metastatic HNSCC (≥ 50% TPS)                                      | PF          | Treatment cost                           | 6,790 | 3,707 |       |       |
|                                                                                         |             | Dispensing cost                          | 55    | 57    |       |       |
|                                                                                         |             | Monitoring and outpatient visit cost     | 185   | 188   | 0.805 | 0.77  |
|                                                                                         |             | Adverse event cost                       | 8     | 101   |       |       |
|                                                                                         | PD          | Subsequent treatment and monitoring cost | 774   | 1,169 | 0.746 | 0.676 |
|                                                                                         | Death       | End-of-life cost                         | 2,506 | 2,506 | -     | -     |
| 1st-line treatment of advanced renal cell carcinoma                                     | PF          | Treatment cost                           | 9,275 | 2,815 |       |       |
|                                                                                         |             | Dispensing cost                          | 61    | 8     |       |       |
|                                                                                         |             | Monitoring and outpatient visit cost     | 253   | 231   | 0.75  | 0.75  |
|                                                                                         |             | Adverse event cost                       | 160   | 111   |       |       |
|                                                                                         | PD          | Subsequent treatment and monitoring cost | 1,630 | 3,860 | 0.66  | 0.66  |
|                                                                                         | Death       | End-of-life cost                         | 2,941 | 2,941 | -     | -     |

Abbreviations: PF, progression-free; PD, progressive disease; NSCLC, non-small cell lung-cancer; TNBC, triple-negative breast cancer; RCC, renal cell carcinoma; HNSCC, head and neck squamous cell carcinoma; TPS, tumor proportion score

**Supplementary Table S3.** Key input data for budget impact analysis

| Non-reimbursed indication                                                               | The expected number of treated patients (the expected market share) |                                 |                                | Annual cost, \$US   |                             |                 |                       |
|-----------------------------------------------------------------------------------------|---------------------------------------------------------------------|---------------------------------|--------------------------------|---------------------|-----------------------------|-----------------|-----------------------|
|                                                                                         | The first year after expansion                                      | The second year after expansion | The third year after expansion | Value-based pricing |                             |                 | 4.75% price reduction |
|                                                                                         |                                                                     |                                 |                                | Scenario 1: IBP     | Scenario 2: IBP with refund | Scenario 3: WAP |                       |
| <b>Atezolizumab</b>                                                                     |                                                                     |                                 |                                |                     |                             |                 |                       |
| 1st-line metastatic NSCLC                                                               | 1,977 (30%)                                                         | 2,727 (40%)                     | 3,526 (50%)                    | 46,509,548          | 46,509,548                  | 57,785,952      | 65,460,619            |
| 1st-line locally advanced or metastatic TNBC                                            | 181 (30%)                                                           | 257 (40%)                       | 341 (50%)                      | 24,612,402          | 24,612,402                  | 31,673,598      | 38,783,951            |
| <b>Nivolumab</b>                                                                        |                                                                     |                                 |                                |                     |                             |                 |                       |
| 2nd-line advanced RCC                                                                   | 82 (30%)                                                            | 114 (40%)                       | 150 (50%)                      | 34,661,572          | 24,837,802                  | 30,639,859      | 23,678,067            |
| 2nd-line recurrent or metastatic HNSCC                                                  | 297 (30%)                                                           | 409 (40%)                       | 527 (50%)                      | 44,835,494          | 13,798,779                  | 17,022,144      | 13,154,482            |
| <b>Pembrolizumab</b>                                                                    |                                                                     |                                 |                                |                     |                             |                 |                       |
| 1st-line treatment of metastatic non-squamous NSCLC                                     | 1,384 (30%)                                                         | 1,909 (40%)                     | 2,468 (50%)                    | 68,497,185          | 68,497,185                  | 86,506,186      | 85,440,250            |
| 1st-line treatment of metastatic squamous NSCLC                                         | 824 (30%)                                                           | 1,136 (40%)                     | 1,469 (50%)                    | 59,759,917          | 59,759,917                  | 74,890,183      | 73,936,452            |
| 1st-line metastatic NSCLC (≥50% TPS)                                                    | 655 (30%)                                                           | 904 (40%)                       | 1,169 (50%)                    | 64,324,818          | 64,324,818                  | 76,313,099      | 75,247,163            |
| 1st-line treatment of metastatic or unresectable recurrent HNSCC as monotherapy         | 506 (30%)                                                           | 695 (40%)                       | 896 (50%)                      | 49,136,322          | 29,087,851                  | 28,109,265      | 27,716,552            |
| 1st-line treatment of metastatic or unresectable recurrent HNSCC as combination therapy | 506 (30%)                                                           | 695 (40%)                       | 896 (50%)                      | 58,814,184          | 47,481,924                  | 46,223,742      | 45,718,825            |
| 2nd-line recurrent or metastatic HNSCC (≥50% TPS)                                       | 155 (30%)                                                           | 213 (40%)                       | 274 (50%)                      | 59,439,937          | 37,398,665                  | 36,140,483      | 35,635,566            |
| 1st-line treatment of advanced renal cell carcinoma                                     | 248 (30%)                                                           | 347 (40%)                       | 455 (50%)                      | 111,220,275         | 111,220,275                 | 158,607,287     | 156,868,130           |

Abbreviations: IBP, indication value-based pricing; WAP, weighted average pricing; NSCLC, non-small cell lung-cancer; TNBC, triple-negative breast cancer; RCC, renal cell carcinoma; HNSCC, head and neck squamous cell carcinoma; TPS, tumor proportion score

**Supplementary Table S4.** Comparator and randomized clinical trial for each indication of immunotherapy

| Indication                                                                              | Intervention                                       | Comparator                                    | Randomized clinical trial    |
|-----------------------------------------------------------------------------------------|----------------------------------------------------|-----------------------------------------------|------------------------------|
| <b>Atezolizumab</b>                                                                     |                                                    |                                               |                              |
| 2nd-line NSCLC (reimbursed indication)                                                  | Atezolizumab                                       | Docetaxel                                     | OAK study                    |
| 1st-line metastatic NSCLC                                                               | Atezolizumab +bevacizumab +paclitaxel +carboplatin | Placebo +bevacizumab +paclitaxel +carboplatin | IMpower150                   |
| 1st-line locally advanced or metastatic TNBC                                            | Atezolizumab +nab-paclitaxel                       | Placebo +nab-paclitaxel                       | IMpassion130                 |
| <b>Nivolumab</b>                                                                        |                                                    |                                               |                              |
| 2nd-line NSCLC (reimbursed indication)                                                  | Nivolumab                                          | Docetaxel                                     | CheckMate 017 +CheckMate 057 |
| 2nd-line advanced RCC                                                                   | Nivolumab                                          | Everolimus                                    | CheckMate 025                |
| 2nd-line recurrent or metastatic HNSCC                                                  | Nivolumab                                          | Docetaxel or Methotrexate or Cetuximab        | CheckMate 141                |
| <b>Pembrolizumab</b>                                                                    |                                                    |                                               |                              |
| 2nd-line NSCLC (reimbursed indication)                                                  | Pembrolizumab                                      | Docetaxel                                     | KEYNOTE-010                  |
| 1st-line treatment of metastatic non-squamous NSCLC                                     | Pembrolizumab +platinum +pemetrexed                | Placebo +platinum +pemetrexed                 | KEYNOTE-189                  |
| 1st-line treatment of metastatic squamous NSCLC                                         | Pembrolizumab +carboplatin +(nab)paclitaxel        | Placebo +carboplatin +(nab)paclitaxel         | KEYNOTE-407                  |
| 1st-line metastatic NSCLC ( $\geq 50\%$ TPS)                                            | Pembrolizumab                                      | Platinum based chemotherapy                   | KEYNOTE-024                  |
| 1st-line treatment of metastatic or unresectable recurrent HNSCC as monotherapy         | Pembrolizumab                                      | Cetuximab +platinum +5-fluorouracil           | KEYNOTE-048                  |
| 1st-line treatment of metastatic or unresectable recurrent HNSCC as combination therapy | Pembrolizumab +platinum +5-fluorouracil            | Cetuximab +platinum +5-fluorouracil           | KEYNOTE-048                  |
| 2nd-line recurrent or metastatic HNSCC ( $\geq 50\%$ TPS)                               | Pembrolizumab                                      | Docetaxel or Methotrexate or Cetuximab        | KEYNOTE-040                  |
| 1st-line treatment of advanced renal cell carcinoma                                     | Pembrolizumab +axitinib                            | Sunitinib                                     | KEYNOTE-426                  |

Abbreviations: NSCLC, non-small cell lung-cancer; TNBC, triple-negative breast cancer; RCC, renal cell carcinoma; HNSCC, head and neck squamous cell carcinoma; TPS, tumor proportion score
